# Supplementary material for: AKIBAT HUKUM PUTUSNYA PERKAWINANKARENA PEMBATALAN PERKAWINANTERHADAP KEDUDUKAN ANAK
Source: MDPI journal article supplement (doi:10.3390/nu14214516), 2010-01-01
Supplement: s1 [file s1]

**Table S1.** Odds ratio (ORs)\* of colorectal cancer and 95% confidence intervals (CIs) for anthocyanins and flavanones intakes among 100 cases and 200 controls, according to variables of interest. Italy 2017-2019.

|                               | Anthocyanidins |                  |                  | Flavanones |                  |                  |
|-------------------------------|----------------|------------------|------------------|------------|------------------|------------------|
|                               | Tertiles†      |                  |                  | Tertiles†  |                  |                  |
|                               | I              | II               | III              | I          | II               | III              |
| <b>Sex</b>                    |                |                  |                  |            |                  |                  |
| Males                         |                |                  |                  |            |                  |                  |
| CRC : Controls                | 33 : 40        | 21 : 39          | 8 : 45           | 28 : 39    | 29 : 42          | 5 : 43           |
| OR (95% CI)                   | 1              | 0.52 (0.23-1.15) | 0.19 (0.06-0.54) | 1          | 0.86 (0.4-1.83)  | 0.12 (0.04-0.42) |
| Females                       |                |                  |                  |            |                  |                  |
| CRC : Controls                | 16 : 26        | 17 : 28          | 5 : 22           | 18 : 28    | 16 : 24          | 4 : 24           |
| OR (95% CI)                   | 1              | 0.79 (0.31-2.02) | 0.27 (0.07-0.97) | 1          | 1.18 (0.4-3.49)  | 0.19 (0.05-0.76) |
| <b>Age</b>                    |                |                  |                  |            |                  |                  |
| <70                           |                |                  |                  |            |                  |                  |
| CRC : Controls                | 28 : 37        | 21 : 43          | 9 : 36           | 25 : 38    | 27 : 38          | 6 : 40           |
| OR (95% CI)                   | 1              | 0.62 (0.29-1.30) | 0.27 (0.09-0.75) | 1          | 1.03 (0.49-2.14) | 0.21 (0.07-0.63) |
| ≥70                           |                |                  |                  |            |                  |                  |
| CRC : Controls                | 21 : 29        | 17 : 24          | 4 : 31           | 21 : 29    | 18 : 28          | 3 : 27           |
| OR (95% CI)                   | 1              | 0.49 (0.15-1.57) | 0.14 (0.04-0.54) | 1          | 0.60 (0.21-1.76) | 0.13 (0.03-0.55) |
| <b>Alcohol intake (g/day)</b> |                |                  |                  |            |                  |                  |
| <12‡                          |                |                  |                  |            |                  |                  |
| CRC : Controls                | 24 : 33        | 21 : 36          | 6 : 41           | 25 : 36    | 22 : 35          | 4 : 39           |
| OR (95% CI)                   | 1              | 0.85 (0.39-1.89) | 0.21 (0.07-0.59) | 1          | 0.92 (0.42-1.99) | 0.15 (0.05-0.5)  |
| ≥12‡                          |                |                  |                  |            |                  |                  |
| CRC : Controls                | 25 : 33        | 17 : 31          | 7 : 26           | 21 : 31    | 23 : 31          | 5 : 28           |
| OR (95% CI)                   | 1              | 0.6 (0.27-1.33)  | 0.3 (0.1-0.89)   | 1          | 0.99 (0.44-2.22) | 0.25 (0.07-0.84) |

\* Estimates from logistic regression model conditioned on study center, sex and age, and adjusted for education, energy intake, alcohol intake and BMI.

† Computed among controls.

‡ Amount corresponding to one standard alcoholic drink.
